# Supplementary material for: Transcriptome analysis of corpora lutea in domestic cats (Felis catus) reveals strong differences in gene expression of various hormones, hormone receptors and regulators across different developmental stages
Source: Springer Nature journal article supplement (doi:10.1186/s12864-025-11510-3), 2025-03-31

**Suppl Fig. 1.: Western Blot against AKR1D1 and beta Actin (control)**

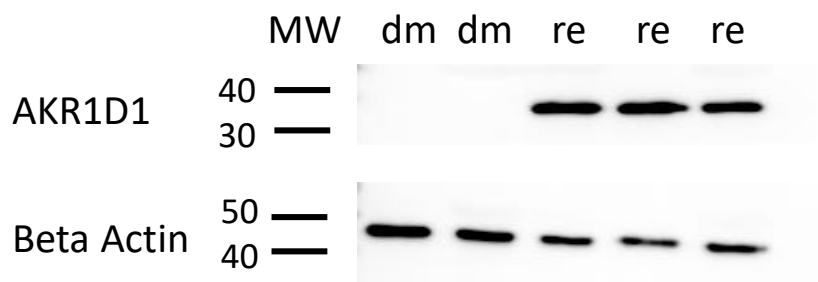

dm – development/maintenance, re – regression  
MW – molecular weight. description of MW in kDa  
AKR1D1 – aldo-keto reductase family 1 member D1

Original blot, lane description was added:

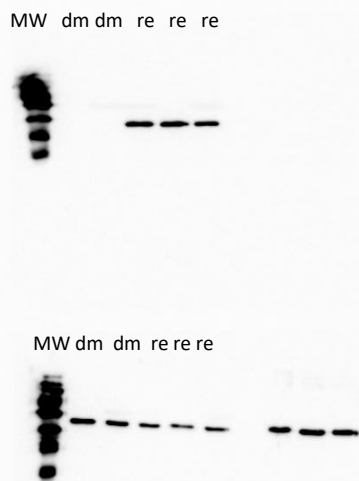

Autoimage of the Imager; combines chemiluminescence signals with a image of the membranes

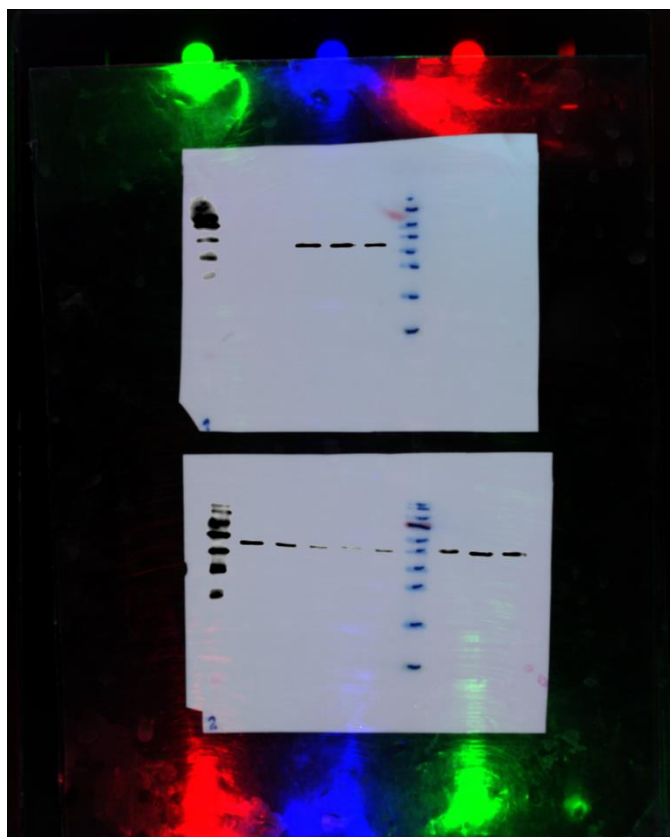

Supplement: MOESM2 [file 12864_2025_11510_MOESM2_ESM.pdf]
